# Supplementary material for: Enhanced Wound Healing- and Inflammasome-Associated Gene Expression in TNFAIP3-Interacting Protein 1- (TNIP1-) Deficient HaCaT Keratinocytes Parallels Reduced Reepithelialization
Source: Hindawi journal article supplement (doi:10.1155/2020/5919150), 2020-04-21
Supplement: f1 [file 5919150.f1.pdf]

| Target     | Forward Primer (5' – 3')        | Reverse Primer (5' – 3')       |
|------------|---------------------------------|--------------------------------|
| TNIP1      | TCC AGG AGC CCT AGG AGT G       | AGG GTA GCT CAG CCC CTG        |
| RPL13a     | CTA TGA CCA ATA GGA AGA GCA ACC | GCA GAG TAT ATG ACC AGG TGG AA |
| FILAGGRIN  | CTG GAC ACT CAG GTT CCC AT      | TTT CGT GTT TGT CTG CTT GC     |
| TGM1       | CCC TCA CCA ATG TCG TCT TC      | TCA CTG TTT CAT TGC CTC CA     |
| KRT1       | GTC TCG AGA AAG GGA GCAA AA     | GCT CCC ATT TTG TTT GCA GT     |
| KRT10      | GAG CCT CGT GAC TAC AGC AA      | ATC TGA AGC AGG ATG TTG GC     |
| KRT5       | GGA GCT CAT GAA CAC CAA GC      | CTG GTC CAA CTC CTT CTC CA     |
| KRT14      | GGC CTG CTG AGA TCA AAG AC      | TCT GCA GAA GGA CAT TGG C      |
| KRT6A      | CTG AGA TCG ACC ACG TCA AG      | CAG CTT GTT CTT GGC ATC CT     |
| KRT6B/C    | TGA GCA GAT CAA GAC CCT CA      | CCA CTT GGT GTC CAG AAC CT     |
| KRT16      | GGC CCA GTG AGA TCAAAG AC       | CAA TCT GCA AAA TGG GCT G      |
| ITGA3      | CCT CTT CGG CTA CTC GGT C       | GGT TGG TGT AGC CAT CGG        |
| INVOLUCRIN | TCT GCC TCA GCC TTA CTG TG      | ACT GAG GGC AGG GGA GAG        |
| LORICRIN   | ACC TGG CCG TCC AAA TAG AT      | CAA ACC TCG GGT AGC ATC AT     |
| CXCR1      | GGC CGG TGC TTC AGT TAG AT      | GGG CAT AGG CGA TGA TCA CA     |
| IL-20      | ATG CCA TTG TGG GGA GGA AG      | CCC AAA GCC TTC ACA ACT GC     |
| S100A8     | ATG CCG TCT ACA GGG ATG AC      | ACG CCC ATC TTT ATC ACC AG     |
| S100A9     | GGA ATT CAA AGA GCT GGT GCG     | AGC TGC TTG TCT GCA TTT GTG    |
| CXCR1      | TAC TGT TGG ACA CAC CTG GC      | ATC CCA CAT CTG TGG ATC TGT    |

| Target      | Forward Primer (5' – 3')          | Reverse Primer (5' – 3')          |
|-------------|-----------------------------------|-----------------------------------|
| TGFβ1       | CCC TGG ACA CCA ACT ATT GC        | CTT CCA GCC GAG GTC CTT           |
| SNAI2       | GAG CAT ACA GCC CCA TCA CT        | GGG TCT GAA ACT TGG ACT G         |
| CCN2        | GAC CTG GAA GAG AAC ATT AAG AAG G | TCG GTA TGT CTT CAT GCT GGT G     |
| PERIOSTIN   | CAG TTT TGC CCA TTG ACC ATG       | ATA GCG CTG CGT TGT GGT G         |
| E-CADHERIN  | TTC TCC GCC TCC TTC TTC AT        | TTC TGC TGC TCT TGC TGT TT        |
| NLRP1       | CAG GCA GCA CAG ATC AAC AT        | GTG ACC TTG AGG ACG GAG AA        |
| AIM2        | CAG AAA TGA TGT CGC AAA GCA       | TCA GTA CCA TAA CTG GCA AAC AG    |
| CASPASE 1   | GCC TGT TCC TGT GAT GTG GAG       | TGC CCA CAG ACA TTC ATA CAG TTT C |
| IL-36γ      | GGG CCG TCT ATC AAT CAA TG        | TGA TAA CAG CAA CAG TGA CTG       |
| IL-18       | CAA TTG CAT CAA CTT TGT GGC       | TAAATA TGG TCC GGG GTG CA         |
| NLRP10      | GGA GGC TGT GAA AGT TGT CC        | ATC TGC CAT TGA CTC CTG CT        |
| ASC         | AGT TTC ACA CCA GCC TGG AA        | TTT TCAAGC TGG CTT TTC GT         |
| GASDERMIN D | GAG TGT GGC CTA GAG CTG G         | GGC TCA GTC CTG ATA GCA GTG       |
| IL-1β       | GAA GCT GAT GGC CCT AAA CA        | AAG CCC TTG CTG TAG TGG TG        |
| A20         | GGG GCC CGG AGA GGT AAA           | GAG GAA GGA CTT GTT CAG CCA       |
| IL-8        | GGA GAG TTT TTG AAG AGG GCT GA    | TGC TTA AGT TTC ACT GGC ATC TT    |
| IL-6        | GGT ACA TCC TCG ACG GCA TCT       | GTG CCT CTT TGC TGC TTT CAC       |
| TNFα        | CTG CTG CAC TTT GGA GTG AT        | AGA TGA TCT GAC TGC CTG GG        |

**Supplementary Table 1. qRT-PCR primers.**

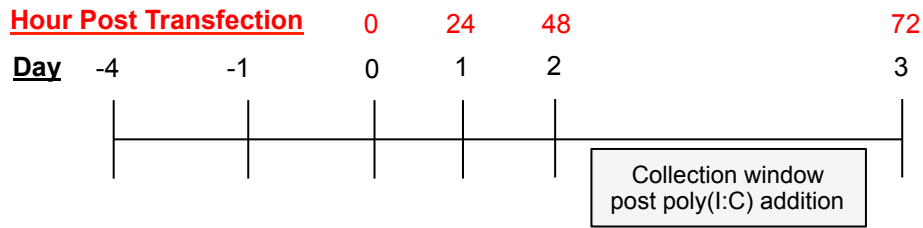

| Day | Experimental Action taken                                                                               |
|-----|---------------------------------------------------------------------------------------------------------|
| -4  | Cells sub-cultured at a 1/20 dilution from 100% confluent plate                                         |
| -1  | Cells plated in 12-well or 24-well plate at final ~40-60% Confluent                                     |
| 0   | Cells transfected with either non-targeting or TNIP1 siRNA                                              |
| 1   | Serum rest period begins with media change into serum free media                                        |
| 2   | Media is removed and replaced with media containing either vehicle control or poly(I:C) at 1 $\mu$ g/mL |
| 3   | Final collection point for cells                                                                        |

(a)

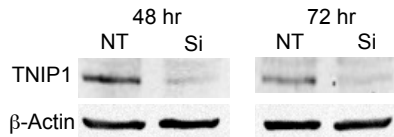

(b)

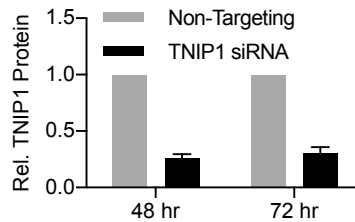

(c)

**Supplementary Figure 1.** (a) Transfection and treatment timeline. (b) Representative western blot analysis of TNIP1 protein levels 48 and 72 hours post transfection with non-targeting siRNA control (NT) or TNIP1 siRNA (Si). (c) Densitometry analysis of western blots with NT control set to 1 after normalization to  $\beta$ -actin. Data presented as mean + SEM from two independent experiments.

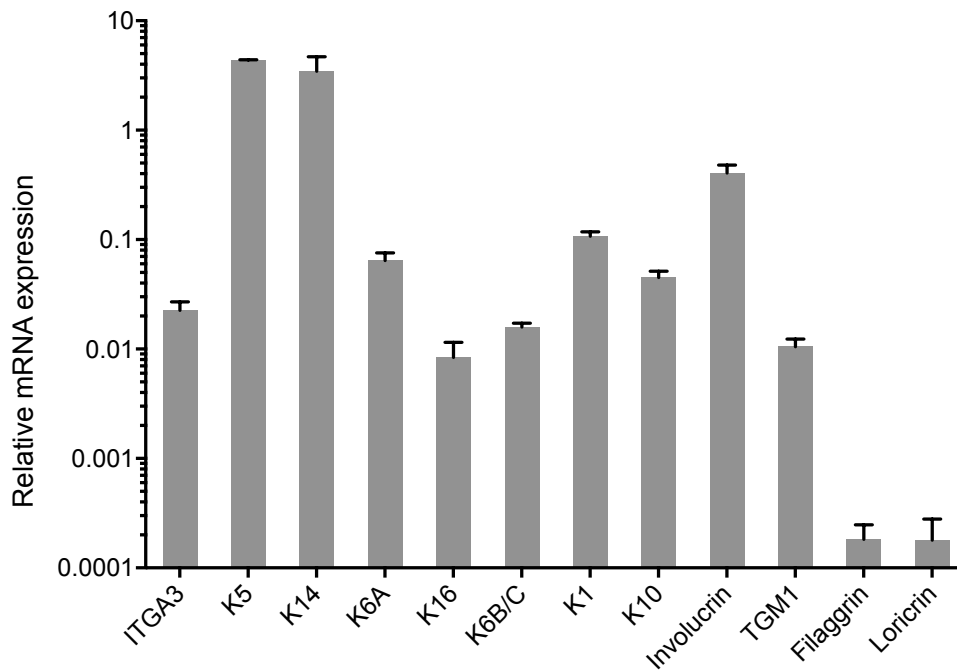

**Supplementary Figure 2. Relative abundance of keratinocyte-associated genes in HaCaTs.** mRNA expression normalized to RPL13a from normal HaCaT keratinocytes 72 hr after plating at ~40% confluence. Cells were serum rested for the 36 hr immediately prior to collection. Data presented as mean + SEM from two independent experiments with conditions in each set in triplicate.

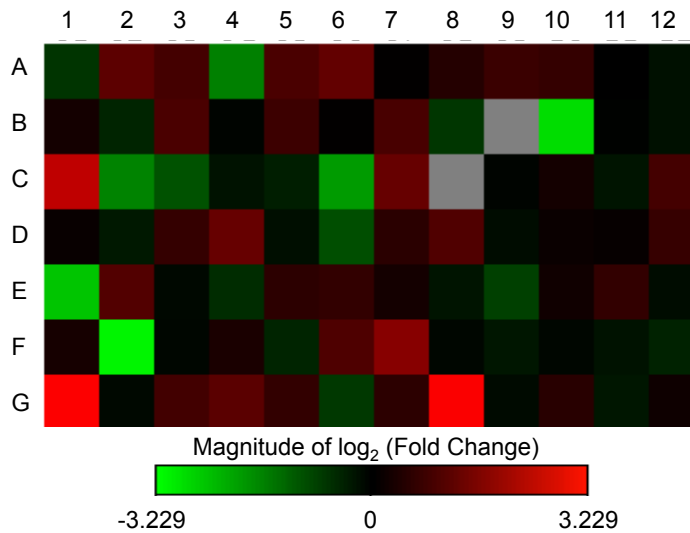

(a)

|   | 01               | 02              | 03             | 04              | 05            | 06              | 07            | 08              | 09             | 10             | 11              | 12              |
|---|------------------|-----------------|----------------|-----------------|---------------|-----------------|---------------|-----------------|----------------|----------------|-----------------|-----------------|
| A | ACTA2<br>-1.59   | ACTC1<br>2.24   | ANGPT1<br>1.83 | CCL2<br>-3.08   | CCL7<br>1.92  | CD40LG<br>2.38  | CDH1<br>1.01  | COL14A1<br>1.38 | COL1A1<br>1.66 | COL1A2<br>1.57 | COL3A1<br>-1.00 | COL4A1<br>-1.15 |
| B | COL4A3<br>1.19   | COL5A1<br>-1.37 | COL5A2<br>1.92 | COL5A3<br>-1.03 | CSF3<br>1.70  | CSF3<br>1.02    | CTGF<br>1.89  | CTNNB1<br>-1.62 | CTSG<br>-1.00  | CTSK<br>-7.06  | CTSV<br>-1.02   | CXCL1<br>-1.15  |
| C | CXCL11<br>5.36   | CXCL2<br>-3.18  | CXCL5<br>-2.06 | EGF<br>-1.17    | EGFR<br>-1.29 | F13A1<br>-3.97  | F3<br>2.46    | FGA<br>-1.00    | FGF10<br>-1.03 | FGF2<br>1.20   | FGF7<br>-1.19   | HBEGF<br>1.81   |
| D | HGF<br>1.08      | IFNG<br>-1.23   | IGF1<br>1.57   | IL10<br>2.45    | IL1B<br>-1.14 | IL2<br>-1.99    | IL4<br>1.43   | IL6<br>2.01     | IL6ST<br>-1.11 | ITGA1<br>1.08  | ITGA2<br>1.05   | ITGA3<br>1.62   |
| E | ITGA4<br>-5.72   | ITGA5<br>2.04   | ITGA6<br>-1.07 | ITGAV<br>-1.48  | ITGB1<br>1.47 | ITGB3<br>1.55   | ITGB5<br>1.19 | ITGB6<br>-1.20  | MAPK1<br>-1.76 | MAPK3<br>1.15  | MIF<br>1.56     | MMP1<br>-1.12   |
| F | MMP2<br>1.21     | MMP7<br>-8.67   | MMP9<br>-1.05  | PDFGA<br>1.26   | PLAT<br>-1.36 | PLAU<br>1.99    | PLAUR<br>3.29 | PLG<br>-1.06    | PTEN<br>-1.21  | PTGS2<br>-1.06 | RAC1<br>-1.17   | RHOA<br>-1.34   |
| G | SERPINE1<br>9.38 | STAT3<br>-1.08  | TAGLN<br>1.79  | TGFA<br>2.20    | TGFB1<br>1.54 | TGFBR3<br>-1.64 | TIMP1<br>1.47 | TNF<br>9.13     | VEGFA<br>-1.10 | VTN<br>1.42    | WISP1<br>-1.20  | WNT5A<br>1.13   |

(b)

**Supplementary Figure 3. TNIP1 deficiency in HaCaT keratinocytes promotes altered expression of genes associated with keratinocyte wound healing.** (a) Heat map for qRT-PCR array results from HaCaT keratinocytes treated with TLR3 agonist poly (I:C) for 6 hr. Fold change calculated comparing TNIP1 siRNA treated cells versus control, normalized against RPLP0. Grey boxes: amplicons with a Ct value greater than set maximum (>35 Ct). (b) Genes among the highest fold changes across array.

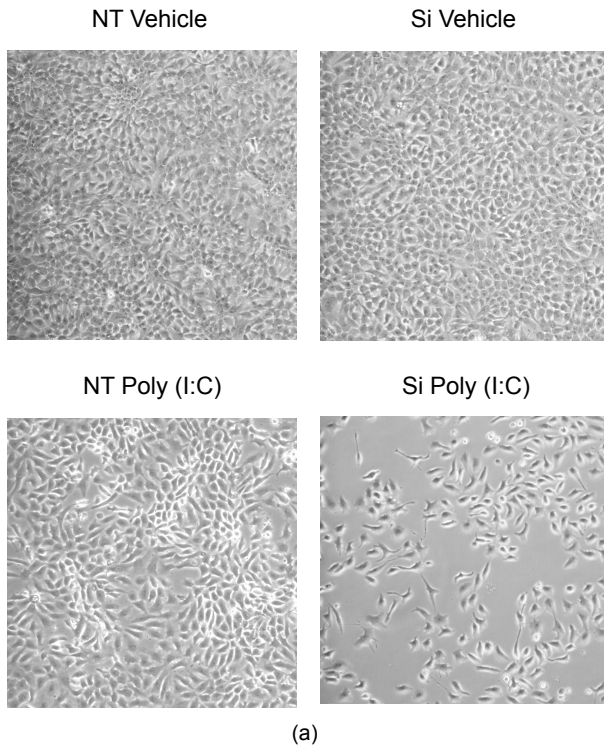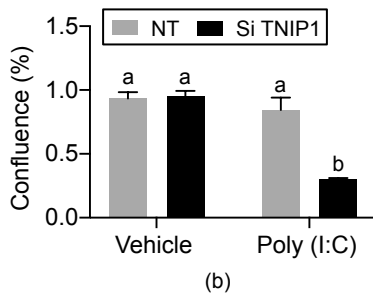

**Supplementary Figure 4. TNIP1 deficiency causes loss of cell confluence after 24 hour exposure to poly (I:C).** (a) Representative images of initially 100% confluent TNIP1 sufficient (NT) or TNIP1 deficient (Si) HaCaT keratinocytes 24 hr post-poly (I:C) exposure. (b) Quantitation of percentage confluence performed using PHANTAST plugin for ImageJ (FIJI client). Total of N=15 images were analyzed for each condition taken from two independent experiments with conditions in each set in triplicate. Means with a common letter are not significantly different by two-way ANOVA followed by Tukey's post hoc-test at a significance level of  $p \leq 0.05$ .
